# Supplementary material for: Performance of FACSPresto Point-of-Care Instrument for CD4-T Cell Enumeration in Human Immunodeficiency Virus (HIV)-Infected Patients Attending Care and Treatment Clinics in Belgium and Tanzania
Source: PLoS One. 2017 Jan 27;12(1):e0170248. doi: 10.1371/journal.pone.0170248 (PMC5271305; doi:10.1371/journal.pone.0170248)
Supplement: S1 File — 1. Clinical data; 2. Adverse events; 3. Intra-assay precision; 4. Inter-instrument precision; 5. Inter-assay precision; 6. Instrument precision; 7. Trueness FACSPresto vs FACSCalibur; 8. Internal controls FACSPresto; 9. External controls Multicheck on FACSCalibur; 10. External controls 10. CD-Chex Plus BC Streck on FACSPresto. (XLSX) [file pone.0170248.s001.xlsx]

## Sheet: Clinical data
1. Clinical information
Sample	Gender	Age	Antiviral treatment
14041270	M	58	Kaletra + Truvada
14041273	M	56	Eviplera
14041277	F	37	Kivexa + Kaletra
14041294	M	24	no HIV
14041301	M	54	Reyataz + Norvir + Truvada
14041302	M	41	Atripla
14041319	M	30	Norvir + Truvada + Prezista
14041340	M	55	Viramune + Truvada
14041348	F	58	Eviplera
14041361	M	33	Kivexa + Norvir + Reyataz
14041376	M	49	truvada/kaletra
14041383	M	72	Kivexa + Invirase + Norvir
14041395	M	45	Viramune + Kivexa
14041406	F	47	Combivir + Viramune + Viread
14041411	F	56	Prezista + Norvir + Truvada
14041415	F	38	Atripla
14041416	M	39	Duovir
14041422	M	59	Atripla
14041423	F	40	Truvada + Kaletra
14041425	M	51	Atripla
14041432	M	54	Zerit + Epivir + Ziagen
14041441	M	56	Truvada + Reyataz + Norvir
14041448	M	51	Trizivir
14041475	M	62	Atripla
14041478	M	36	Truvada + Viramune
14041482	M	46	Isentress + Truvada + Reyataz + Norvir
14041486	M	47	Emtriva + Viread + Isentress
14041489	M	49	Atripla
14041494	F	43	Reyataz + Kivexa
14041496	M	50	geen
14041497	M	36	Viramune + Truvada
14041505	M	38	Reyataz + Norvir + Truvada
14041510	M	79	Stocrin/Sustiva + Kivexa
14041513	M	58	Celsentri + Norvir + Prezista + Viramune
14041515	M	78	Kivexa + Viramune
14041516	F	64	Ziagen + Kaletra + Epivir
14041522	M	42	Norvir + Reyataz + Truvada
14041523	M	20	stribild
14041571	F	37	Kivexa + Stocrin/Sustiva
14041582	M	50	Eviplera
14041584	M	42	Prezista + Norvir + Truvada
14041585	M	58	Kivexa + Viramune
14041586	M	46	Eviplera
14041592	M	39	Atripla
14041593	F	63	Kivexa + Stocrin/Sustiva
14041600	M	36	Reyataz + Norvir + Truvada
14041605	M	38	Atripla
14041615	F	26	Atripla
14041619	M	36	Prezista + Norvir + Truvada
14041623	F	51	Kaletra + Combivir
14041638	M	47	Stocrin/Sustiva + Kivexa
14041645	M	29	Atripla
14041680	M	55	Viramune + Truvada
14041692	F	38	Reyataz + Norvir + Truvada
14041702	F	44	Kivexa + Viread + Stocrin/Sustiva
14041708	M	43	Reyataz + Norvir + Kivexa
14041721	M	55	Atripla
14041741	M	71	Reyataz + Combivir
14041800	M	39	Truvada + Norvir + Prezista
14041804	M	54	Viramune + Truvada
14041817	M	83	Norvir + Trizivir + Isentress + Prezista
14041818	M	55	Reyataz + Norvir + Emtriva + Isentress
14041827	F	29	Kaletra + Kivexa
14041828	M	22	Eviplera
14041834	F	48	Kivexa + Norvir + Prezista
14041838	F	32	Atripla
14041839	M	39	Eviplera
14041851	F	31	Viramune + Kivexa
14041857	F	79	geen
14041861	F	66	Atripla
14041862	M	37
14041864	F	61	Telzir + Norvir + Kivexa
14041911	M	49	Atripla
14041914	M	52	Truvada + Reyataz
14041918	F	51	Truvada + Viramune
14041924	M	52	Reyataz + Norvir + Kivexa
14041930	M	52	Viread + Retrovir + Isentress
14041931	M	51	Atripla
14041935	M	59	Atripla
14041939	M	38	Stocrin/Sustiva + Kivexa
14041941	M	49	Viramune + Truvada
14041948	M	70	Truvada + Isentress
14041962	M	32	Eviplera
14041969	M	35	geen
14042033	F	48	Kivexa + Reyataz + Norvir
14042061	F	37	Viramune + Truvada
14042074	M	55	Reyataz + Norvir + Truvada
14042084	M	46	Kivexa + Kaletra
14042085	M	50	reyataz truvada
14042126	M	52	Reyataz + Norvir + Truvada
14042128	F	48	Celsentri + Isentress + Prezista + Norvir + Truvada
14042137	F	40	Truvada + Isentress + Stocrin/Sustiva
14042315	M	56	Viramune + Kivexa
14042554	M	21	Eviplera
14042607	F	50	Kivexa + Reyataz
14042615	F	38	Norvir + Prezista + Truvada
14042714	M	48	Kivexa + Norvir + Reyataz
14042730
14042751	M	43	Kaletra + Truvada
14042775	F	36	Prezista + Norvir + Truvada
14050002	M	24	Eviplera
14050009	M	45	Prezista + Norvir + Truvada
14050036	M	50	Atripla
14050039	M	35	Prezista + Truvada + Norvir
14050082	M	30	stribild
14050144	M	65	Atripla
14050254	M	33	reyataz truvada
14050255	M	54	Prezista + Norvir + Truvada
14050292	M	43	Stocrin/Sustiva + Truvada
14050312	F	28	Eviplera
14050313	F	34	Combivir + Viramune
14050314	F	36	Reyataz + Kivexa
14050450	F	55	Viramune + Isentress + Truvada
14050481	F	49	Epivir + Kaletra
14050488	M	58	viramune truvada
14050506	M	46	Viramune + Truvada
14050508	F	45	prezista norvir truvada
14050572	M	64	Prezista + Norvir + Truvada
14050584	F	41	Prezista + Norvir + Truvada
14050624	M	40	Prezista + Norvir + Truvada
14050704	M	43	Eviplera
14050714	F	41	Reyataz + Kivexa + Norvir
14050728	F	24	stribild
14050730	F	25	Emtriva + Norvir + Reyataz + Ziagen
14050744	M	40	Atripla
14050793	M	32	Atripla
14050820	F	28	Viramune + Truvada
14050833	M	45	stribild
14051043	F	19	viramune truvada
14051057	F	46	Prezista + Norvir + Isentress + Truvada
14051165	M	29	Eviplera
14051180	F	46	Intelence + Isentress + Combivir
14051182	M	43	Truvada + Viramune
14051183	M	76	Kivexa + Intelence
14051200	F	34	Atripla
14051210	F	58	Retrovir + Ziagen + Viramune
14051400	F	68	Norvir + Reyataz + Celsentri
14051453	F	51	Atripla
14051601	M	36	prezista norvir truvada
14051665	M	62	Truvada + Viramune
14051712	M	48	Truvada + Reyataz
14051851	M	41	Norvir + Prezista + Kivexa
14051863	F	24	Truvada + Kaletra
14051998	M	46	Norvir + Epivir + Prezista
14052031	M	38	Reyataz + Norvir + Kivexa
14052103	M	59	Epivir + Viread + Viramune
14052147	M	40	Eviplera
14052177	M	45	Atripla
14052196	M	48	Kivexa + Isentress
14052375	F	44	Reyataz + Norvir + Truvada
14052480	M	48	stribild
14052520	M	43	Reyataz + Norvir + Truvada
14052647	M	51	Stocrin/Sustiva + Truvada
14052667	F	60	Prezista + Norvir + Isentress + Combivir
14060024	M	41	prezista norvir truvada
14060053	M	40	reyataz norvir truvada
14060115	M	57	geen
14060118	M	59	Kivexa + Viramune
14060141	F	48	Prezista + Norvir + Truvada
14060175	M	45	Prezista + Norvir + Truvada
14060177	F	38	Norvir + Reyataz + Truvada
14060180	M	28	prezista norvir kivexa
14060183	M	46	Truvada + Norvir + Reyataz
14060185	F	45	Truvada + Viramune
14060186	F	38	Eviplera
14060188	F	32	Viramune + Truvada
14060191	M	54	Viramune + Truvada
14060238	M	37	Stocrin/Sustiva + Truvada
14060243	M	40	Atripla
14060265	M	46	Kivexa + Reyataz
14060383	M	51	Atripla
14060422	M	49	Atripla
14060445	M	23	Eviplera
14060490	M	59	Viramune + Truvada
14060520	F	50	Stocrin/Sustiva + Combivir + Viread
14060555	M	30	Atripla
14060556	M	42	viramune truvada
14060568	M	34	edurant kivexa
14060569	M	38	stribild
14060572	M	42	Stocrin/Sustiva + Truvada
14060585	M	40	stocrin truvada
14060659	M	42	prezista norvir truvada
14060665	M	61	Viramune + Truvada
14060684	M	51	Atripla
14060685	F	38	reyataz norvir combivir
14060758	M	59	stribild
14060785	M	41	viramune truvada
14060948	M	72	Celsentri + Prezista + Norvir
14060990	M	62	Prezista + Norvir + Isentress
14061056	M	60	geen
14061257
14061675	M	41	reyataz norvir truvada
14061846	M	52	geen
14061860	M	67	Isentress + Epivir + Reyataz
14061868	M	61	Reyataz + Kivexa
14061872	M	83	Norvir + Trizivir + Isentress + Prezista
14061876	M	35	Eviplera
14061881	M	30	Kivexa + Stocrin/Sustiva
14061897	M	56	Viramune + Truvada
14061921	M	47	Combivir + Viramune

## Sheet: Adverse events
2. Adverse events
Sample	Assay type	Blood type	Nurse	Instrument Presto	Failure reason (first reading)	Instrument n° if new Presto	Failure reason (second reading)	Instrument n° if new Presto	Failure reason (third reading)	Instrument n° if new Presto	Failure reason (fourth reading)
14032150-5	Precision	Veneus		57	5A20	-	-
14032284-1	Agreement/Precision	Veneus		49	6B17	-	-
14032284-2	Precision	Veneus		49	6B02/QC cartridge failure	57	6B02
14032284-1	Agreement/Precision	Veneus		53	6B02/QC cartridge failure	-	-
14032284-7	Precision	Veneus		53	6B02/QC cartridge failure	-	-
14032284-2	Precision	Veneus		57	6B02/QC cartridge failure	-	-
14040283-2	Precision	Veneus		49	6B17	-	-
14040671-3	Precision	Veneus		49	6B17	-	-
14040951-4	Precision	Veneus		53	6B0F	53	-
14040951-1	Agreement/Precision	Veneus		53	6B0F
14040951-8	Precision	Veneus		53	6B0F	53	6B0F	53	-
14040951-6	Precision	Veneus		53	6B0F	53	6B0F
14040951-3	Precision	Veneus		57	5A20	57	-
14040951-1	Agreement/Precision	Veneus		42	6B0F	42	6B0F
14040951-7	Precision	Veneus		42	6B07	42	6B0F	42	-
14040951-3	Precision	Veneus		49	6B17	-	-
14040951-5	Precision	Veneus		49	6B0F	49	6B0F	49	-
14041270	Agreement	Veneus		53	5B09	53	-
14041395	Agreement	Veneus		53	5B0B	53	-
14041406	Agreement	Capillary	1	53	6B02/QC cartridge failed	42	6B02/QC cartridge failed
14041415	Agreement	Capillary	1	42	6B02/QC cartridge failed	53	6B02/QC cartridge failed
14041416	Agreement	Capillary	1	57	6B02/QC cartridge failed	53	6B02/QC cartridge failed
14041586	Agreement	Capillary	1	53	5B09	53	-
14041593	Agreement	Veneus		57	Cartridge is not completely filled
14041619	Agreement	Capillary	3	53	5B09	53	-
14041800	Agreement	Capillary	1	53	5B09	53	-
14041862	Agreement	Capillary	1	53	6B0F	57	-
14041862	Agreement	Veneus		53	6B0F	57	6B0F	57	6B0D
14042061-6	Precision	Veneus		53	5A20	53	-
14042607	Agreement	Veneus		57	Cartridge is not completely filled
14042714	Agreement	Capillary	3	53	6B02/QC cartridge failed	57	6B02/QC cartridge failed	42	6B02/QC cartridge failed
14050255-24h	Precision	Veneus		42	Cartridge is not completely filled
14050314-8	Precision	Capillary		42	6B02/QC cartridge failed	42	-
14050312-6	Precision	Veneus		49	6B17	49	-
14050481	Agreement	Veneus		57	6B02/QC cartridge failed	42	6B02/QC cartridge failed	42	-
14050441-24h	Precision	Veneus		57	6B0F	57	-
14050446-48h	Precision	Veneus		42	6B0F
14050450-48h	Precision	Veneus		57	Cartridge is not completely filled	57	-
14051043	Agreement	Veneus		42	Cartridge is not completely filled	42	Cartridge is not completely filled	42	-
14050833-24h	Precision	Veneus		57	6B0F	57	6B0F	57	-
14051165	Agreement	Veneus		42	5B0C	42	-
14050833-48h	Precision	Veneus		57	6B0F	42	6B0F
14051180-6h	Precision	Veneus		42	Cartridge is not completely filled
14051182	Agreement	Capillary	1	57	5A20	57	-
14051180-48h	Precision	Veneus		42	6B0F	42	-
14051182-48h	Precision	Veneus		57	6B0F	57	6B0F	57	-
14051601	Agreement	Capillary	2	42	Cartridge is not completely filled
14051743-1	Agreement/Precision	Veneus		53	5B0C	53	-
14051743-4	Precision	Veneus		53	5B09	53	-
14051743-2	Precision	Veneus		53	5B09	53	-
14051743-6	Precision	Veneus		53	5B09	53	-
14051743-9	Precision	Veneus		53	5B09	53	-
14051591-24h	Precision	Veneus		57	6B0F	57	-
14051591-48h	Precision	Veneus		57	5A20
14051626-48h	Precision	Veneus		42	6B0F	42	6B0F	42	-
14051713-24h	Precision	Veneus		57	6B0F	57	-
14051858-0h	Agreement/Precision	Veneus		53	5B08
14051858-0h	Agreement/Precision	Veneus		53	5B09
14051591-72h	Precision	Veneus		57	6B0F
14051601-72h	Precision	Veneus		42	6B0F
14051713-48h	Precision	Veneus		57	6B0F	57	6B0F	57	6B0F	57	-
14051998-1	Agreement/Precision	Capillary	2	49	6B17
14051998-6	Precision	Capillary		49	6B17
14051998-6	Precision	Veneus		49	6B17
14052205-6h	Precision	Veneus		49	6B0F	49	6B0F	49	-
14052205-24h	Precision	Veneus		49	6B0F	49	-
14052375-1	Agreement/Precision	Veneus		49	Cartridge is not completely filled
14052375-4	Precision	Veneus		49	Cartridge is not completely filled
14052197-24h	Precision	Veneus		49	6B0F	49	6B0F	49	-
14052197-48h	Precision	Veneus		49	6B0F	49	-
14052205-48h	Precision	Veneus		49	6B0F	42	6B0F
14052480-1	Agreement/Precision	Veneus		53	5B09	53
14052480-5	Precision	Veneus		53	5B0B	53	5B09	53	-
14052480-8	Precision	Veneus		53	5B09	53
14052480-10	Precision	Veneus		53	5B09	53	5B08	53	-
14052480-9	Precision	Veneus		49	6B17
14060180-9	Precision	Veneus		49	6B17
14061056	Agreement	Veneus		57	6B0F	57	-
14061444-48h	Precision	Veneus		42	6B0F	42	-
14062343-5	Precision	Veneus		57	6B02	-	-
normal				53	5B0C
low				53	5B0C
normal				53	5B0C
normal				53	5B0B
normal				53	5B0C
low				53	5B0C
low				53	5B0C
normal				53	5B0C
normal				53	5B0C
low				53	5B0B
normal				53	5B09			pilot 53 no more in use ; WHO and BD informed
low				53	5B0C
normal				53	5B09
low				53	5B0C
normal				49	value printed as 0 (but right on screen; result again printed: OK)
low				53	5B0C
low				53	5B0C
normal				53	5B0C
normal				53	5B0C
low				53	5B0B
normal				53	5B09			pilot 53 no more in use ; WHO and BD informed
low				53	5B0C
normal				53	5B09
low				53	5B0C
normal				49	value printed as 0 (but right on screen; result again printed: OK)

## Sheet: Intra assay
3. Intra-assay FACSPresto venous blood
Sample	Category	Pilot	Replicate	CD4	CD4%
14042714	350	42	1	321	22.61
1			2	295	20.97
WHO study			3	314	21.42
			4	317	22.46
			5	298	21.13
			6	330	21.88
			7	312	21.56
			8	339	23.68
			9	331	22.68
			10	354	23.24
14050313	500	42	1	481	24.17
1			2	479	23.1
WHO study			3	456	22.86
			4	439	23.12
			5	485	25.01
			6	423	22.61
			7	499	25.69
			8	469	24.41
			9	437	23.08
			10	455	22.66
14050481	200	42	1	155	11.55
1			2	162	11.78
WHO study			3	167	12.12
			4	157	11.34
			5	157	11.41
			6	159	11.45
			7	154	11.32
			8	161	11.68
			9	158	11.53
			10	152	11.14
14052375	200	49	1	183	11.86
2			2	180	11.61
WHO study			3	181	11.57
			4	196	11.57
			5	190	12.05
			6	202	12.67
			7	199	12.21
			8	169	10.67
			9	193	11.92
			10	199	12.18
14060188	500	42	1	508	40.97
2			2	486	40.04
from inter-instrument			3	498	40.35
			4	481	38.58
			5	482	38.56
			6	501	39.52
			7	491	39.95
			8	510	41.56
			9	489	38.77
			10	498	40.33
14032150	200	42	1	239	39.58
3			2	242	37.66
from inter-instrument			3	263	41.36
			4	268	39.95
			5	233	36.43
			6	251	37.51
			7	249	38.23
			8	255	39.19
			9	249	37.18
			10	243	37.97
14040283	200	49	1	200	9.71
4			2	274	12.33
from inter-instrument			3	232	11
			4	266	12.23
			5	277	12.54
			6	238	10.97
			7	251	11.82
			8	216	10.31
			9	289	12.96
			10	232	10.66
14042061	350	53	1	318	24.91
2			2	317	24.69
from inter-instrument			3	321	24.48
			4	358	27.22
			5	332	24.43
			6	321	23.81
			7	325	24.13
			8	340	25.62
			9	301	23.4
			10	302	23.82
14052480	350	49	1	361	31.37
3			2	341	28.84
from inter-instrument			3	351	29.53
			4	372	30.73
			5	353	30.08
			6	349	30.27
			7	337	29.26
			8	337	29.44
			9	328	28.42
			10	324	28.07
14032733	500-	49	1	448	28.86
3			2	432	29.27
from inter-instrument			3	454	29.45
			4	442	28.99
			5	438	29.15
			6	458	30.79
			7	441	29.61
			8	457	30.18
			9	445	29.99
			10	415	29.04
14062316	350-	42	1	309	15.76
4			2	316	15.76
from routine			3	304	14.88
			4	261	13.36
			5	288	13.99
			6	279	14.49
			7	292	15.08
			8	300	15.18
			9	274	14.26
			10	291	14.9
14062343	500	57	1	495	17.38
4			2	537	19.16
from routine			3	544	21.14
			4	489	18.67
			5	541	20.37
			6	529	19.71
			7	534	19.71
			8	521	20.19
			9	545	19.82
			10	514	19.3

## Sheet: Inter instrument
4. Inter-instrument FACSPresto venous blood
Sample	Category		Pilot 42		Pilot 49		Pilot 53		Pilot 57
14032150	200	Cartridge	CD4	CD4%	CD4	CD4%	CD4	CD4%	CD4	CD4%
1		1	239	39.58	231	38.22	237	38.48	242	39.01
		2	242	37.66	240	36.4	244	37.64	248	37.79
		3	263	41.36	257	40.4	257	40.17	262	39.15
		4	268	39.95	260	39.58	262	39.75	261	39.11
		5	233	36.43	239	36.52	234	36.69	235	37.44
		6	251	37.51	249	38.47	249	37.35	252	37.86
		7	249	38.23	244	37	243	37.48	248	37.74
		8	255	39.19	263	38.95	257	39.11	264	39.86
		9	249	37.18	248	36.97	244	36.6	246	36.55
		10	243	37.97	233	38.77	232	39.44	236	37.52
14032284	no	Cartridge	CD4	CD4%	CD4	CD4%	CD4	CD4%	CD4	CD4%
		1	-	-	-	-	-	-	-	-
		2	-	-	-	-	-	-	-	-
		3	293	20.13	286	19.72	292	20.19	294	20.12
		4	277	20.01	282	20.18	276	20.01	282	20.38
		5	302	20.94	284	19.67	288	20.3	289	20.2
		6	291	19.66	277	18.72	281	19.11	287	19.23
		7	-	-	-	-	-	-	-	-
		8	297	20.14	303	20.37	289	19.75	297	20.14
		9	285	19.15	289	19.17	282	19.2	285	19.68
		10	313	20.03	305	19.65	301	19.6	316	20.42
		11	281	20	274	19.5	269	19.27	274	19.5
		12	275	19.25	267	18.87	263	18.77	267	19.01
		13	274	18.31	274	18.06	272	18.16	266	17.85
14032733	500-	Cartridge	CD4	CD4%	CD4	CD4%	CD4	CD4%	CD4	CD4%
2		1	441	28.61	448	28.86	443	28.31	442	28.59
		2	432	29.17	432	29.27	430	29.16	428	28.75
		3	451	29.74	454	29.45	440	29.31	444	29.29
		4	449	29.17	442	28.99	444	29.23	429	28.31
		5	443	29.4	438	29.15	440	29.52	438	29.7
		6	448	30.32	458	30.79	443	30.27	456	30.81
		7	444	29.6	441	29.61	448	29.87	434	29.22
		8	453	29.76	457	30.18	456	29.96	441	29.24
		9	446	30.31	445	29.99	440	29.7	441	29.83
		10	416	29.17	415	29.04	412	29.08	405	28.75
14040283	200	Cartridge	CD4	CD4%	CD4	CD4%	CD4	CD4%	CD4	CD4%
2		1	207	9.8	200	9.71	255	11.9	207	9.83
		2	217	10.15	274	12.33	222	10.34	284	12.79
		3	229	11	232	11	215	10.16	220	10.47
		4	229	10.75	266	12.23	223	10.28	230	10.6
		5	284	12.84	277	12.54	222	10.38	223	10.79
		6	233	10.83	238	10.97	235	10.72	231	10.69
		7	193	9.25	251	11.82	190	9.11	258	11.98
		8	218	10.46	216	10.31	231	10.92	213	10.35
		9	243	11.16	289	12.96	229	10.56	233	10.74
		10	221	10.16	232	10.66	230	10.63	228	10.65
14040671	no	Cartridge	CD4	CD4%	CD4	CD4%	CD4	CD4%	CD4	CD4%
		1	302	17.72	300	17.79	303	17.68	298	17.46
		2	285	18.05	284	17.94	282	17.5	284	18.19
		3	284	17.9	278	17.46	287	18.35	285	17.95
		4	270	16.67	270	16.58	267	16.54	267	16.5
		5	257	16.53	253	16.16	258	16.54	256	16.37
		6	307	17.73	310	17.72	311	17.67	314	18.02
		7	288	17.59	301	18.21	301	18.32	296	17.86
		8	306	18.34	302	18.05	292	17.61	297	17.89
		9	293	17.84	285	17.74	279	17.53	281	17.9
		10	293	18.12	290	17.63	297	18.12	299	18.25
14042061	350	Cartridge	CD4	CD4%	CD4	CD4%	CD4	CD4%	CD4	CD4%
1		1	316	24.57	314	24.54	318	24.91	306	24.32
		2	324	24.94	308	24.11	317	24.69	300	24.26
		3	323	24.73	326	24.62	321	24.48	325	24.8
		4	333	25.28	346	26.27	358	27.22	336	26.14
		5	338	24.51	349	25.13	332	24.43	339	24.84
		6	328	24.02	324	23.78	321	23.81	323	24.56
		7	327	23.98	328	24.28	325	24.13	331	24.22
		8	321	24.54	336	25.16	340	25.62	351	26.2
		9	305	23.57	311	23.87	301	23.4	311	24.04
		10	308	24	307	24.11	302	23.82	308	24.22
14050312	no	Cartridge	CD4	CD4%	CD4	CD4%	CD4	CD4%	CD4	CD4%
		1	395	33.09	392	33.25	415	34.56	389	33.24
		2	465	38.12	471	38.31	437	36.96	438	36.78
		3	451	36.57	451	36.61	405	34.24	418	35.15
		4	404	35.59	378	33.97	379	34.04	378	33.61
		5	424	35.72	448	37.16	421	36.32	411	35.07
		6	390	34.71	432	37.28	404	35.98	383	34.4
		7	419	36.09	422	36.47	396	35.26	402	35.52
		8	407	36.25	373	34.13	369	33.7	399	35.5
		9	405	34.37	437	36.37	442	36.48	413	34.78
		10	404	34.01	412	34.17	399	33.64	407	33.87
14051743	no	Cartridge	CD4	CD4%	CD4	CD4%	CD4	CD4%	CD4	CD4%
		1	142	10.72	145	10.92	139	10.45	141	10.64
		2	143	10.99	143	11.02	140	10.82	137	10.83
		3	134	10.88	143	11.3	141	11.09	138	11.08
		4	125	9.91	120	9.61	120	9.51	124	9.85
		5	137	10.58	145	11.06	145	11.04	145	11.14
		6	138	10.5	160	11.87	135	10.36	142	10.92
		7	150	11.41	147	11.14	148	11.27	147	11.13
		8	154	11.62	152	11.47	163	12.12	153	11.53
		9	141	10.63	145	10.91	-	-	141	10.77
		10	164	12.13	140	10.54	166	12.43	137	10.42
14052480	350	Cartridge	CD4	CD4%	CD4	CD4%	CD4	CD4%	CD4	CD4%
2		1	358	30.97	362	30.6	356	30.94	361	31.37
		2	334	28.21	342	28.74	332	28.29	341	28.84
		3	355	29.8	353	29.62	340	28.71	351	29.53
		4	354	29.8	376	30.96	357	29.85	372	30.73
		5	365	30.34	356	30.02	355	30.02	353	30.08
		6	351	29.83	356	30.19	353	30.12	349	30.27
		7	336	28.76	328	28.24	325	28.45	337	29.26
		8	330	28.64	341	29.56	346	29.76	337	29.44
		9	330	28.6	331	28.55	317	27.69	328	28.42
		10	316	27.33	312	27.14	320	27.99	324	28.07
14060188	500	Cartridge	CD4	CD4%	CD4	CD4%	CD4	CD4%	CD4	CD4%
1		1	508	40.97	515	41.44	-	-	512	41.25
		2	486	40.04	482	39.82	-	-	483	39.85
		3	498	40.35	487	40.47	-	-	499	40.59
		4	481	38.58	482	38.6	-	-	491	39.01
		5	482	38.56	465	37.85	-	-	459	37.54
		6	501	39.52	497	39.12	-	-	469	38.07
		7	491	39.95	488	39.67	-	-	481	39.33
		8	510	41.56	494	40.83	-	-	508	41.21
		9	489	38.77	488	39.7	-	-	480	38.64
		10	498	40.33	501	40.68	-	-	490	39.94

## Sheet: Inter assay
5. Inter-assay FACSPresto venous blood
Sample	Pilot	Category		Replicate	CD4	CD4%
14050254	42	200		0h
			14050254	6h	232	40.13
			14050254	24h	231	40.46
			14050254	48h	248	39.06
14050255	42	200		0h
			14050255	6h	231	10.65
			14050255	24h	282	12.04
			14050255	48h	288	13.3
14050441	57	350	14050441	0h	358	12.14
			14050441	6h
			14050441	24h	353	13.87
			14050441	48h	322	12.77
14050446	42	200	14050446	0h	218	18.03
			14050446	6h
			14050446	24h	241	22.49
			14050446	48h	224	20.25
14050450	57	no	14050450	0h	392	21.79
			14050450	6h
			14050450	24h	363	22.75
			14050450	48h	351	21.3
14050833	57	200	14050833	0h	184	13.64
			14050833	6h	161	13.61
			14050833	24h	225	16.22
			14050833	48h
14050860	53	350	14050860	0h	323	11.4
			14050860	6h	264	11.46
			14050860	24h	296	13.39
			14050860	48h	311	12.31
14051006	42	500	14051006	0h	508	31.3
			14051006	6h	516	31.16
			14051006	24h	489	31.52
			14051006	48h	436	31.12
14051010	42	500	14051010	0h	501	38.12
			14051010	6h	457	37.58
			14051010	24h	454	37.86
			14051010	48h	422	38.3
14051016	53	500	14051016	0h	530	17.4
			14051016	6h	509	18.68
			14051016	24h	509	18.62
			14051016	48h	428	18.15
14051165	42		14051165	0h	406	40.83
	57	350	14051165	6h	382	41.45
	57		14051165	24h	391	43.73
	57		14051165	48h	361	41.83
14051180	42	350	14051180	0h	363	15.32
			14051180	6h	355	17.96
			14051180	24h	392	17.13
			14051180	48h	276	15.26
14051182	57	no	14051182	0h	300	18.14
			14051182	6h	289	19.16
			14051182	24h	293	20.13
			14051182	48h	282	18.23
14051591	57	-350	14051591	0h	385	19.95
			14051591	6h	415	20.97
			14051591	24h	418	22.36
			14051591	48h	349	20.37
14051601	42	no	14051601	0h	422	17.05
			14051601	6h	469	17.91
			14051601	24h	432	19.08
			14051601	48h	443	19.08
14051626	42	no	14051626	0h	297	23.09
			14051626	6h	272	24.63
			14051626	24h	300	27.46
			14051626	48h	207	19.47
14051712	42	no	14051712	0h	426	29.47
			14051712	6h	409	29.66
			14051712	24h	475	33.34
			14051712	48h	398	30.17
			14051712	72h	272	23.15
14051713	57	no	14051713	0h	423	18.44
			14051713	6h	410	19.17
			14051713	24h	460	20.04
			14051713	48h	383	18.26
			14051713	72h	297	16.26
14051718	42	no	14051718	0h	428	27.82
			14051718	6h	385	27.3
			14051718	24h	473	30.14
			14051718	48h	314	26.37
			14051718	72h	343	26.72
14051851	57	no	14051851	0h	275	19.43
			14051851	6h	252	20.33
			14051851	24h	277	22.97
			14051851	48h	260	23.34
14051858	49	no	14051858	0h	866	35.97
			14051858	6h	867	37.73
			14051858	24h	790	37.22
			14051858	48h	706	35.86
14051863	42	(200)	14051863	0h	241	18.86
			14051863	6h	202	17.75
			14051863	24h	242	22.18
			14051863	48h	209	20.29
14051881	49	no	14051881	0h
			14051881	6h	256	10.13
			14051881	24h	239	9.95
			14051881	48h	214	8.95
14052197	49	(200)	14052197	0h	206	16.12
			14052197	6h	194	16.04
			14052197	24h	175	15.78
			14052197	48h	165	14.12
14052205	49	no	14052205	0h
			14052205	6h	19	4.4
			14052205	24h	32	7.3
			14052205	48h
14061444	42	500	14061444	0h
			14061444	6h	457	33.36
			14061444	24h	435	34.93
			14061444	48h	424	36.9
14061510	49	no	14061510	0h
			14061510	6h	439	24.41
			14061510	24h	452	29.54
			14061510	48h	412	27.43

## Sheet: Instrument
6. Instrument precision FACSPresto venous and capillary blood
				Venous blood		Capillary blood
Sample	Category	Pilot	Replicate	CD4	CD4%	CD4	CD4%
14041741	350	57	1	378	33.77	384	31.24
1			2	371	33.29	376	30.19
			3	369	32.97	371	31.16
			4	374	33.29	380	30.58
			5	374	33.34	386	30.95
			6	373	33.27	370	30.05
			7	367	32.8	393	31.46
			8	376	33.41	387	31.14
			9	375	33.3	388	31.25
			10	379	33.64	401	31.92
			Mean	373.6	33.308	383.6	30.994
			SD	3.77712	0.280785	9.67471	0.573531
			CV	1.01101	0.842995	2.52208	1.85046
14041962	500	53	1	508	30.99	507	34.3
1			2	506	30.64	505	34.34
			3	509	30.62	502	34.02
			4	512	30.91	505	34.27
			5	509	30.74	506	34.18
			6	511	30.83	507	34.59
			7	510	30.89	500	33.99
			8	505	30.69	509	34.51
			9	505	30.78	509	34.46
			10	507	30.85	510	34.67
14042775	200+	53	1	357	14.92	247	12.65
5			2	351	14.74	250	12.82
			3	358	14.89	246	12.78
			4	349	14.6	252	13.02
			5	351	14.69	244	12.56
			6	341	14.32	247	12.81
			7	363	15.14	240	12.42
			8	369	15.33	240	12.48
			9	379	15.67	237	12.34
			10	350	14.76	244	12.74
14050082	200	53	1	217	10.54	240	10.28
1			2	217	10.3	244	10.46
			3	211	9.94	241	10.32
			4	217	10.11	243	10.41
			5	215	9.95	242	10.35
			6	214	9.84	244	10.45
			7	222	10.18	245	10.52
			8	210	9.74	255	10.96
			9	221	10.14	237	10.26
			10	219	10.05	244	10.47
14050144	350	53	1	321	24.89	350	26.59
2			2	317	24.84	336	25.94
			3	327	25.12	341	26.2
			4	315	24.66	338	26
			5	314	24.74	338	26.06
			6	320	24.93	339	26.1
			7	314	24.71	338	25.91
			8	317	25.11	341	26.26
			9	321	25.24	343	26.29
			10	320	25.11	341	26.28
14050314	200	42	1	161	14.63	160	14.8
2			2	154	14.18	159	14.57
			3	153	14.26	156	14.35
			4	158	14.7	162	14.99
			5	157	14.59	163	14.96
			6	157	14.53	162	14.98
			7	159	14.77	163	15.16
			8	178	16.23	160	15
			9	156	14.42	156	14.65
			10	151	14.2	165	15.33
14050506	200	57	1	215	13.73	238	13.64
3			2	218	13.82	239	13.7
			3	220	13.86	232	13.28
			4	233	14.58	235	13.44
			5	218	13.67	235	13.45
			6	217	13.7	237	13.56
			7	224	14.09	229	13.18
			8	213	13.54	228	13.23
			9	219	13.87	235	13.55
			10	223	14.06	235	13.55
14050572	500	42	1	458	24.34	490	23.62
2			2	473	24.61	482	23.43
			3	466	24.26	487	23.62
			4	479	24.72	487	23.62
			5	482	24.52	486	23.68
			6	488	24.94	482	23.54
			7	491	24.94	495	24.1
			8	489	25.03	497	24.33
			9	491	24.99	502	24.51
			10	499	25.31	495	24.23
14050584	no	57	1	237	15.62	313	17.96
			2	236	15.59	314	17.02
			3	232	15.31	310	16.78
			4	231	15.21	323	17.28
			5	237	15.59	318	17.02
			6	238	15.67	326	17.29
			7	237	15.46	311	17.1
			8	237	15.62	326	17.18
			9	247	16.07	326	17.13
			10	236	15.59	309	16.35
14051043	no	42	1	382	31.26	456	33.65
			2	373	30.62	453	33.8
			3	378	31.55	457	33.79
			4	372	31.3	450	33.49
			5	373	31.2	459	34.34
			6	371	31.04	452	34.03
			7	369	30.86	455	34.07
			8	367	31.1	461	34.63
			9	371	31.18	460	34.39
			10	391	32.11	459	34.51
14051998	500-	49	1	435	23.44	473	24.05
5			2	439	23.98	466	23.61
			3	426	23.38	495	24.85
			4	426	23.39	490	24.88
			5	430	23.61	469	24.1
			6	468	25.12	489	25.17
			7	428	23.39	494	25.49
			8	419	23.03	461	24.09
			9	409	22.67	459	23.98
			10	465	25.27	477	24.58
14052103	350	49	1	382	24.66	323	25.17
3			2	379	24.84	320	25.07
			3	366	24.11	319	24.93
			4	372	24.62	323	25.25
			5	377	25.02	317	25.08
			6	376	25.01	322	25.55
			7	377	24.89	319	25.29
			8	372	24.95	327	25.6
			9	374	24.92	321	25.23
			10	371	24.88	322	25.62
14052196	500	42	1	451	26.3	482	26.77
3			2	446	25.92	464	26.01
			3	452	26.05	478	26.56
			4	448	25.75	462	26.05
			5	464	26.44	475	26.38
			6	448	25.84	459	25.65
			7	441	25.46	463	25.86
			8	438	25.4	479	26.52
			9	470	26.54	459	25.66
			10	469	26.51	456	25.69
14052520	200	49	1	209	22.06	230	25.76
4			2	222	22.77	237	26.23
			3	217	22.81	236	25.93
			4	221	23.01	238	26.3
			5	214	22.5	233	26.15
			6	213	22.38	239	26.79
			7	210	22.28	238	26.23
			8	210	22.31	241	26.53
			9	219	22.87	238	26.23
			10	228	23.99	241	26.78
14052667	no	42	1	254	18.51	309	18.89
			2	253	18.32	308	18.76
			3	253	18.34	307	18.86
			4	256	18.62	303	18.6
			5	262	18.88	302	18.53
			6	255	18.47	300	18.32
			7	250	18.22	304	18.66
			8	257	18.55	307	18.73
			9	262	19	306	18.68
			10	253	18.49	306	18.89
14060118	350	57	1	396	28.02	384	29.38
4			2	375	26.88	383	29.45
			3	377	26.87	382	29.47
			4	390	27.75	390	30.23
			5	370	26.6	384	29.83
			6	392	27.76	379	29.33
			7	391	28	385	29.9
			8	387	27.63	384	29.85
			9	400	28.1	385	30.07
			10	396	28.01	384	29.94
14060141	350	42	1	358	24.28	342	20.82
5			2	351	24.06	349	21.24
			3	354	24.25	348	21.19
			4	353	24.06	349	21.11
			5	347	23.92	343	20.99
			6	349	24.09	346	21.08
			7	346	23.73	345	20.91
			8	348	23.91	344	21.06
			9	347	24.18	353	21.44
			10	359	24.64	347	21.2
14060180	500+	49	1	553	23.42	539	29.97
4			2	568	23.79	534	29.79
			3	591	24.58	536	29.72
			4	590	24.59	541	30.29
			5	587	24.51	546	30.44
			6	589	24.59	544	30.27
			7	589	24.61	543	30.44
			8	591	24.62	543	30.29
			9	587	24.57	539	30.19
			10	588	24.57	544	30.51

## Sheet: Trueness
7. Trueness FACSCalibur - FACSPresto
Sample n°	Cal CD4	Cal CD4%	Pr Venous CD4	Pr venous CD4%	Pr finger CD4	Pr finger CD4%	Nurse	Presto pilot
14041270	740	27.69	742	27.64	690	30.8	1	53
14041273	435	28.83	545	30.9	465	29.18	2	42
14041277	937	28.84	935	31.17	895	28.67	2	57
14041294	420	22.33	434	24.27	419	22.39	1	53
14041301	541	22.96	607	23.23	606	26.68	1	57
14041302	413	30.22	422	31.45	395	30.52	2	53
14041319	491	19.27	525	20.29	509	21	1	42
14041340	471	14.84	446	15.34	391	18.02	1	53
14041348	667	46.38	667	45.51	614	48.25	1	57
14041361	843	36.45	802	35.82	845	36.84	2	42
14041376	560	26.37	594	26.55	585	27.14	1	42
14041383	768	26.69	744	27.54	732	32.46	2	57
14041395	861	31.49	803	31.39	714	34.97	1	53
14041406	234	15.55	220	15.69			1	53
14041411	379	12.35	341	12.86	453	12.37	1	57
14041415	722	33.08	734	34.11			1	42
14041416	317	34.22	368	35.26			1	57
14041422	797	36.38	784	36.09	713	36.83	2	42
14041423	895	32.85	908	33.98	794	33.75	2	53
14041425	989	32.97	1066	34.56	871	37.63	1	42
14041432	473	18.74	494	20.01	464	22.61	2	57
14041441	488	28.55	498	29.06	487	31.42	2	53
14041448	799	39.45	863	39.36	857	40.72	2	57
14041475	348	20.32	351	20.52	324	20.87	3	53
14041478	842	22.75	779	23.71	859	22.92	2	57
14041482	700	33.2	645	32.11	736	32.38	1	53
14041486	565	25.35	528	26.26	566	26.46	3	42
14041489	636	37	624	35.52	749	33.85	1	57
14041494	1593	35.12	1571	34.6	1559	36.42	3	57
14041496	550	23.57	545	23.13	596	21.83	3	42
14041497	185	16.2	213	16.61	197	16.38	1	53
14041505	454	22.94	474	24.06	422	23.97	3	42
14041510	384	30.53	402	29.64	417	32.55	1	53
14041513	648	23.74	618	24.12	813	25.93	1	57
14041515	599	30.36	656	30.35	728	29.86	1	42
14041516	772	20.11	789	21.59	770	22.33	1	53
14041522	315	29.22	292	27.16	363	26.68	3	53
14041523	285	19.74	278	19.56	253	16.4	2	57
14041571	611	28.27	634	28.65	683	29.5	2	53
14041582	309	20.73	355	22.8	321	21.95	2	57
14041584	206	9.72	242	10.44	229	9.51	2	42
14041585	769	24.11	818	24.59	802	23.34	2	57
14041586	590	30.41	647	30.03	764	32.24	1	53
14041592	666	29.54	700	31.16	689	33.88	2	53
14041593	617	22.93	708	24.8	868	25.68	1	57
14041600	637	30.38	741	31.48	873	33.81	2	42
14041605	530	30.33	601	32.88	515	32.93	1	53
14041615	652	31.54	712	33.19	699	37.01	1	57
14041619	658	22.96	655	22.64	611	25.05	3	53
14041623	556	37.85	549	37.51	702	40.67	1	53
14041638	914	34.24	963	35.16	1155	35.64	1	53
14041645	328	26.28	325	26.36	387	28.39	3	57
14041680	357	32.16	384	32.48	344	34.09	2	53
14041692	1013	43.83	1056	42.6	1100	42.03	2	57
14041702	583	33.76	573	31.39	639	34.16	3	42
14041708	904	35.04	940	35.28	973	36.11	1	53
14041721	602	30.14	629	30.1	619	29.27	1	53
14041741	298	30.17	378	33.77	384	31.24	2	57
14041800	514	14.88	531	14.49	725	15.12	1	53
14041804	1292	31.86	1126	32.69	915	34.17	3	57
14041817	213	22.31	207	22.17	206	23.78	1	53
14041818	818	26.59	865	27.77	825	29.38	3	57
14041827	484	27.83	499	27.21	554	29.43	3	53
14041828	1032	52.34	1004	49.19	990	51.95	1	57
14041834	35	2.44	[39]	[2,88]	[42]	[2,85]	3	53
14041838	498	34.99	544	36.04	540	36.25	3	53
14041839	825	51.59	864	49.71	841	51.07	1	57
14041851	837	31.48	891	30.83	1122	33.58	3	42
14041857	1314	31.3	1247	30.84	1387	30.17	3	53
14041861	454	28.16	441	27.12	440	29.13	3	57
14041862	3	0.72			[3]	[0,58]	1	57
14041864	649	36.42	674	34.57	741	34.83	1	42
14041911	419	38.43	425	37.99	483	38.39	1	53
14041914	490	27.92	457	27.57	523	31.8	1	57
14041918	531	32.09	514	32.14	594	35.06	1	42
14041924	526	25.23	512	25.58	468	28.34	1	53
14041930	228	14.72	274	16.39	230	15.73	1	53
14041931	796	23.28	831	25.62	590	22.92	3	57
14041935	589	37.74	631	37.99	687	40.89	3	53
14041939	872	36.33	934	37.14	888	39.97	1	53
14041941	463	12.22	351	11.07	463	13.59	3	57
14041948	513	34.09	493	31.79	499	37.25	1	42
14041962	478	29.75	508	30.99	507	34.3	3	53
14041969	315	13.78	384	15.48	299	14.01	1	57
14042033	1474	46.91	1405	46.11	1444	46.18	3	53
14042061	285	23.01	338	25.54	316	23.62	1	53
14042074	717	36.23	690	37.07	725	36.84	1	57
14042084	818	34.56	740	32.93	939	33.1	1	42
14042085	809	34.04	838	35.02	792	35.82	3	53
14042126	375	18.9	349	17.53	342	17.96	1	57
14042128	614	29.94	658	29.75	679	31.07	1	53
14042137	759	45.02	828	46.17	900	45.58	3	42
14042315	326	22.64	334	24.08	325	25	1	53
14042554	320	21.2	424	23.96	393	25.48	1	57
14042607	397	19.29	351	19.11	354	18.91	3	57
14042615	553	33.07	590	32.8	619	32.96	1	57
14042714	322	23.02	324	23.17			3	53
14042730	630	27.61	626	27.12	616	29.71	1	57
14042751	299	22.21	331	22.64	421	26.48	1	53
14042775	310	12.88	357	14.92	247	12.65	3	53
14050002	514	31.79	506	33.08	411	33.08	1	57
14050009	440	19.44	439	19.54	368	20.11	3	57
14050036	296	29.43	256	25.11	296	28.07	1	53
14050039	477	30.99	570	34.18	445	34.54	1	53
14050082	245	10.14	217	10.54	240	10.28	1	53
14050144	321	24.79	321	24.89	350	26.59	1	53
14050254	217	42.83	232	40.13	266	41.05	1	42
14050255	257	11.34	231	10.65	330	12.64	2	42
14050292	325	30.54	370	34.59	405	33.78	2	57
14050312	396	35.11	389	33.24	543	35.09	1	57
14050313	435	22.69	481	24.17	529	24.56	3	42
14050314	149	14.63	161	14.63	160	14.8	1	42
14050450	361	20.91	392	21.79	369	21.54	1	57
14050481	161	11.78	155	11.55	155	12.74	3	42
14050488	129	10.61	128	9.68	125	9.52	3	57
14050506	196	13.57	215	13.73	238	13.64	1	57
14050508	96	9.56	101	9.43	123	10.17	1	42
14050572	385	20.97	458	24.34	490	23.62	1	42
14050584	208	14.48	237	15.62	313	17.96	1	57
14050624	304	18.25	295	16.64	278	18.32	1	42
14050704	437	30.82	455	30.95	456	34.99	3	57
14050714	469	23.57	468	22.13	468	22.62	3	42
14050728	329	24.53	324	23.27	338	23.21	3	57
14050730	499	27.06	533	27.57	508	28.37	3	42
14050744	416	12.27	457	12.84	469	12.42	1	57
14050793	297	13.33	345	14.9	369	12.83	2	57
14050820	362	14.74	414	15.23	470	15.66	1	57
14050833	175	12.4	184	13.64	180	12.21	2	57
14051043	328	32.5	382	31.26	456	33.65	1	42
14051057	155	8.19	149	7.64	184	9.32	2	42
14051165	354	41.4	389	41.22	431	33.06	2	42
14051180	378	15.94	346	15.97	371	15.99	2	53
14051182	295	18.62	276	17.55	296	19.84	1	57
14051183	391	35.46	394	31.86	429	33.16	2	42
14051200	362	33.58	327	31.11	260	29.29	2	57
14051210	424	28.1	433	26.31	404	28.27	1	57
14051400	338	14.48	354	13.76	358	15.05	2	57
14051453	209	34.92	217	33.97	255	33.03	3	42
14051601	457	18.46	422	17.05			2	42
14051665	292	9.32	270	8.95	274	10.1	1	57
14051712	434	30.77	426	29.47	477	32.74	1	42
14051851	291	21.16	275	19.43	306	22.71	1	57
14051863	196	17.79	241	18.86	220	17.06	1	42
14051998	447	23.69	435	23.44	473	24.05	2	49
14052031	242	19.79	240	16.99	251	16.07	1	42
14052103	317	22.3	382	24.66	323	25.17	1	49
14052147	360	28.04	318	26.08	380	28.28	3	49
14052177	309	19.55	322	19.27	335	20.41	1	49
14052196	409	25.8	451	26.3	482	26.77	1	42
14052375	181	11.43	180	11.61	170	10.59	3	49
14052480	328	28.97	358	30.97	385	30.83	1	42
14052520	220	25.12	209	22.06	230	25.76	1	49
14052647	394	30.77	369	30.18	400	29.21	1	57
14052667	257	17.54	254	18.51	309	18.89	1	42
14060024	570	24.27	579	25.04	591	27.68	1	57
14060053	266	14.33	231	13.57	289	15.27	3	49
14060115	244	19.11	19	1.49	103	6.33	1	49
14060118	402	26.96	396	28.02	384	29.38	2	57
14060141	367	24.05	358	24.28	342	20.82	1	42
14060175	189	16.17	179	14.74	270	14.11	1	49
14060177	213	15.8	218	15.12	197	16.73	1	49
14060180	549	24.43	553	23.42	539	29.97	3	49
14060183	491	29.58	510	29.98	558	28.31	3	49
14060185	382	29.74	406	29.57	476	33.18	1	49
14060186	445	20.09	496	20.76	526	17.28	1	49
14060188	477	39.56	515	41.44	579	39.96	1	49
14060191	567	24.42	559	24.16	556	25.29	1	49
14060238	448	23.1	475	24.96	390	24.54	2	57
14060243	346	20.69	367	23.93	355	23.55	2	42
14060265	241	14.4	290	16.45	316	16.66	1	49
14060383	320	18.28	321	19.42	321	18.7	1	57
14060422	296	19.57	314	19.83	272	21.69	1	49
14060490	187	23.05	189	21.41	212	24.99	1	49
14060520	556	28.81	565	28.74	577	25.53	2	42
14060555	327	21.14	336	19.83	351	20.17	1	57
14060556	326	13.58	353	14.43	391	14.06	1	49
14060568	602	32.13	655	33.39	619	32.71	2	57
14060569	362	13.04	408	14.93	372	14.88	1	42
14060572	246	19.15	253	18.77	218	17.3	3	49
14060585	519	24.84	517	25.12	538	25.58	2	42
14060659	146	12.5	169	13.17	135	11.43	2	49
14060665	388	34.96	398	36.22	433	36.81	3	42
14060684	323	22.83	359	25.19	346	25.05	2	57
14060685	652	40.84	902	41.3	820	43.37	3	49
14060758	595	23.09	558	25.13	545	24.94	3	42
14060785	182	20.69	167	19.93	180	19.71	2	49
14060948	213	19.52	196	18.04	220	17.99	2	49
14060990	357	19.51	396	19.95	286	18.19	3	42
14061056	223	11.91	221	12.05	256	13.55	2	57
14061257	36	3.69	29	3.13	21	2.54	3	49
14061268	229	30.03	195	24.57	190	21.53	2	42
14061675	59	7.11	45	6.44	87	8.57	3	49
14061846	594	25.19	650	25.36	587	23.43	2	57
14061860	974	29.2	1014	28.7	950	29.24	2	42
14061868	1598	46.32	1641	48.56	1623	43.23	2	42
14061872	222	21.33	239	20.5	304	21.78	2	49
14061876	727	30.73	783	30.89	729	32	3	57
14061881	397	19.92	450	21.79	501	26.09	3	49
14061897	411	28.99	434	28.11	399	30.63	3	42
14061921	617	40.11	683	38.41	771	40.73	3	57

## Sheet: Internal controls
8. Internal control on FACSPresto (PostInstrQc)
All data during study
	Pilot 42				Pilot 49				Pilot 53				Pilot 57
Day	Normal	Low		Day	Normal	Low		Day	Normal	Low		Day	Normal	Low
2014-03-18 05:05:00	795	238		2014-03-18 04:55:00	773	232		3/18/14 9:40	805	241		2014-03-18 04:52:00	817	245
2014-03-19 00:31:00	793	238		2014-03-19 00:32:00	776	232		3/19/14 9:28	804	241		2014-03-19 00:30:00	815	244
2014-03-25 12:20:00	794	238		2014-03-19 02:45:00	774	232		3/19/14 11:38	806	241		2014-03-25 12:21:00	816	245
2014-03-26 12:30:00	794	238		2014-03-19 03:05:00	780	234		3/25/14 12:21	805	241		2014-03-26 12:31:00	816	244
2014-03-26 14:46:00	795	238		2014-03-25 03:24:00	778	233		3/26/14 12:30	805	241		2014-03-26 14:48:00	817	245
2014-03-31 13:34:00	796	238		2014-03-26 03:34:00	778	233		3/26/14 14:47	805	241		2014-03-31 13:35:00	817	245
2014-04-02 13:43:00	795	238		2014-03-26 04:36:00	774	232		3/31/14 13:35	805	241		2014-04-02 13:57:00	817	245
2014-04-07 14:40:00	796	238		2014-03-26 05:50:00	773	232		2014-02-04 13:57:00	806	241		2014-04-07 13:55:00	817	245
2014-04-08 14:40:00	795	238		2014-03-31 04:38:00	774	232		2014-07-04 13:54:00	806	241		2014-04-10 09:23:00	817	245
2014-04-10 10:21:00	795	238		2014-04-02 04:47:00	774	232		2014-10-04 09:22:00	806	241		2014-04-11 08:24:00	816	244
2014-04-11 09:22:00	794	238		2014-04-07 14:40:00	774	232		2014-11-04 08:23:00	805	241		2014-04-14 08:23:00	817	245
2014-04-11 14:41:00	794	238		2014-04-08 14:41:00	774	232		2014-11-04 14:30:00	805	241		2014-04-14 16:12:00	817	245
2014-04-14 12:45:00	794	238		2014-04-10 10:21:00	773	232		4/14/14 8:23	805	241		2014-04-15 09:36:00	816	245
2014-04-14 17:10:00	796	238		2014-04-11 09:22:00	778	233		4/14/14 16:12	806	241		2014-04-16 10:16:00	816	245
2014-04-15 10:50:00	794	238		2014-04-11 14:41:00	778	233		4/15/14 9:35	805	241		2014-04-17 08:19:00	816	245
2014-04-16 12:09:00	795	238		2014-04-24 12:16:00	778	233		4/16/14 10:16	806	241		2014-04-18 08:41:00	816	244
2014-04-17 10:31:00	795	238		2014-04-30 11:12:00	774	232		4/17/14 8:06	805	241		2014-04-18 15:14:00	817	245
2014-04-18 09:43:00	794	238		2014-05-06 14:16:00	774	232		4/18/14 8:40	805	241		2014-04-22 09:08:00	816	244
2014-04-22 12:43:00	795	238		2014-05-09 15:20:00	774	232		4/22/14 9:08	805	241		2014-04-23 09:02:00	816	245
2014-04-22 17:07:00	796	238		2014-05-20 15:07:00	779	233		4/23/14 9:02	805	241		2014-04-24 09:36:00	816	244
2014-04-23 10:32:00	795	238		2014-05-21 12:01:00	773	232		4/24/14 9:36	805	241		2014-04-25 08:53:00	816	245
2014-04-24 11:18:00	794	238		2014-05-21 17:35:00	780	234		4/25/14 8:53	805	241		2014-04-29 09:28:00	817	245
2014-04-30 11:12:00	796	238		2014-05-22 10:29:00	774	232		4/28/14 10:22	805	241		2014-04-30 11:13:00	816	244
2014-05-05 16:48:00	795	238		2014-05-23 10:21:00	774	232		4/30/14 11:13	805	241		2014-05-02 09:23:00	817	245
2014-05-06 09:53:00	795	238		2014-05-26 09:16:00	773	232		4/30/14 12:36	806	241		2014-05-05 16:49:00	816	245
2014-05-06 17:32:00	797	239		2014-05-27 09:16:00	779	233		2014-02-05 11:56:00	805	241		2014-05-06 11:51:00	817	245
2014-05-07 08:42:00	795	238		2014-05-28 09:38:00	774	232		2014-05-05 09:42:00	806	241		2014-05-07 09:09:00	816	244
2014-05-08 08:43:00	795	238		2014-05-30 14:34:00	778	233		2014-06-05 10:37:00	805	241		2014-05-08 09:28:00	816	245
2014-05-08 11:08:00	796	239		2014-06-02 10:36:00	773	232		2014-06-05 14:18:00	806	241		2014-05-08 16:36:00	818	245
2014-05-08 16:46:00	797	239		2014-06-02 17:32:00	775	232		2014-07-05 16:03:00	805	241		2014-05-09 09:32:00	817	245
2014-05-09 09:31:00	795	238		2014-06-03 10:19:00	773	232		2014-08-05 14:05:00	805	241		2014-05-12 09:13:00	817	245
2014-05-13 10:38:00	796	238		2014-06-04 09:59:00	773	232		2014-09-05 15:21:00	805	241		2014-05-13 10:40:00	817	245
2014-05-14 10:22:00	795	238		2014-06-05 12:07:00	773	232		2014-12-05 10:13:00	805	241		2014-05-14 09:13:00	817	245
2014-05-15 09:35:00	795	238		2014-06-06 09:52:00	773	232		5/13/14 10:40	805	241		2014-05-15 09:04:00	817	245
2014-05-16 09:09:00	795	238		2014-06-10 09:38:00	774	232		5/14/14 10:24	805	241		2014-05-16 08:45:00	816	244
2014-05-19 09:28:00	796	238		2014-06-11 11:09:00	777	233		5/15/14 10:12	805	241		2014-05-19 10:49:00	817	245
2014-05-20 09:00:00	795	238		2014-06-12 11:11:00	777	233		5/16/14 9:21	805	241		2014-05-20 10:51:00	816	245
2014-05-21 09:25:00	795	238		2014-06-13 11:12:00	777	233		5/20/14 15:08	806	241		2014-05-21 11:13:00	817	245
2014-05-22 09:35:00	796	238		2014-06-16 12:51:00	777	233		5/21/14 9:26	805	241		2014-05-22 09:36:00	817	245
2014-05-23 10:21:00	796	238		2014-06-17 10:59:00	777	233		2014-05-28 05:49:00	807	242		2014-05-23 10:22:00	817	245
2014-05-26 12:01:00	796	238		2014-06-18 15:20:00	777	233						2014-05-28 15:20:00	816	245
2014-05-27 09:16:00	796	238		2014-06-19 10:25:00	777	233						2014-05-30 12:31:00	816	245
2014-05-28 09:39:00	796	238		2014-06-20 09:47:00	777	233						2014-06-02 10:37:00	817	245
2014-05-30 14:30:00	795	238		2014-06-23 10:44:00	777	233						2014-06-03 10:21:00	816	244
2014-06-02 10:36:00	795	238		2014-06-24 14:05:00	777	233						2014-06-04 10:00:00	816	244
2014-06-03 10:19:00	796	238		2014-06-25 10:22:00	777	233						2014-06-05 12:08:00	816	245
2014-06-04 09:59:00	796	238		2014-06-26 15:12:00	777	233						2014-06-06 09:53:00	816	245
2014-06-05 12:07:00	796	238										2014-06-10 10:46:00	816	245
2014-06-06 09:51:00	796	238										2014-06-11 13:19:00	815	244
2014-06-10 09:30:00	797	239										2014-06-12 12:10:00	815	244
2014-06-11 09:56:00	794	238										2014-06-13 09:13:00	814	244
2014-06-12 12:09:00	794	238										2014-06-16 12:52:00	815	244
2014-06-13 10:40:00	794	238										2014-06-17 11:00:00	815	244
2014-06-16 12:51:00	794	238										2014-06-18 15:21:00	815	244
2014-06-17 10:59:00	794	238										2014-06-19 10:26:00	816	244
2014-06-18 15:22:00	794	238										2014-06-23 09:44:00	816	244
2014-06-19 10:25:00	794	238										2014-06-24 14:06:00	815	244
2014-06-20 09:47:00	794	238										2014-06-25 18:23:00	815	244
2014-06-23 10:07:00	795	238										2014-06-26 15:13:00	815	244
2014-06-24 14:05:00	794	238
2014-06-25 11:21:00	794	238
2014-06-26 15:12:00	794	238

## Sheet: Multicheck
9. Multicheck on FACSCalibur
Normal	Lot n°	BM044N		Low	Not delivered
	Expiry	2014-05-02
	Range CD4	1019,6 (815,7-1223,5)
	Range CD4%	48,9 (42,4-55,4)
Day	CD4 Value Normal	CD4% Value Normal	OK ?
2014-04-14	1055	48.71	OK
2014-04-15	1033	48.01	OK
2014-04-16	948	49.18	OK
2014-04-17	984	49.32	OK
2014-04-18	947	51.17	OK
2014-04-22	855	47.84	OK
2014-04-23	915	47.57	OK
2014-04-24	969	48.74	OK
2014-04-25	948	49.6	OK
Normal	Lot n°	BM054N		Low	Lot n°	BM054L
	Expiry	2014-06-02			Expiry	2014-06-02
	Range CD4	968.4 (755.3-1181.4)			Range CD4	173.6 (104.2-243.0)
	Range CD4%	47.4 (40.9-53.9)			Range CD4%	15.2 (11.2-19.2)
Day	CD4 Value Normal	CD4% Value Normal	OK ?	CD4 Value Low	CD4% Value Low	OK ?
2014-04-29	1097	48.91	OK	144	14.5	OK
2014-04-30	887	48.44	OK	148	15.11	OK
2014-05-02	848	48.32	OK	144	14.9	OK
2014-05-05	908	47.08	OK	158	15.57	OK
2014-05-06	985	49.46	OK	148	15	OK
2014-05-07	864	48.39	OK	156	16.3	OK
2014-05-08	886	48.13	OK	149	15.12	OK
2014-05-09	895	48.46	OK	175	17.88	OK
2014-05-12	1010	48.01	OK	156	15.69	OK
2014-05-13	809	47.52	OK	152	15.3	OK
2014-05-14	897	48.12	OK	148	15.48	OK
2014-05-15	897	48.9	OK	148	17.2	OK
2014-05-16	911	49.16	OK	148	14.88	OK
2014-05-17	880	48.6	OK	159	17.74	OK
2014-05-20	844	47.09	OK	151	15.82	OK
2014-05-21	856	47.78	OK	148	15.58	OK
2014-05-22	915	48.78	OK	139	14.64	OK
2014-05-23	841	47.73	OK	159	15.96	OK
2014-05-26	867	47.53	OK	157	15.48	OK
2014-05-27	894	47.48	OK	154	16.28	OK
2014-05-28	797	46.51	OK	141	15.53	OK
2014-05-30	925	47.51	OK	155	15.35	OK
Normal	Lot n°	BM064N		Low	Lot n°	BM064L
	Expiry	2014-07-02			Expiry	2014-02-07
	Range CD4	923.1 (738.5-1107.7)			Range CD4	156.4 (93.8-218.9)
	Range CD4%	51.8 (45.3-58.3)			Range CD4%	14.4 (10.4-18.4)
Day	CD4 Value Normal	CD4% Value Normal	OK ?	CD4 Value Low	CD4% Value Low	OK ?
2014-06-02	743	53.39	OK	157	15.54	OK
2014-06-03	854	51.94	OK	140	14.92	OK
2014-06-04	931	53.77	OK	159	15.15	OK
2014-06-05	873	51.38	OK	148	13.96	OK
2014-06-06	861	51.59	OK	154	16.06	OK
2014-06-10	833	52.41	OK	140	14.26	OK
2014-06-11	846	52.05	OK	144	14.36	OK
2014-06-12	825	53.02	OK	146	14.82	OK
2014-06-16	835	52.35	OK	139	14.9	OK
2014-06-18	852	51.18	OK	147	15.02	OK
2014-06-19	903	53.04	OK	144	14.84	OK
2014-06-20	930	54.83	OK	141	14.96	OK
2014-06-23	885	52.6	OK	155	14.98	OK

## Sheet: CD Chex Plus BC
10. CD-Chex Plus BC Streck on FACSPresto
Normal	Lot n°	40830041		Low	Lot n°	40830040
	Expiry	2014-06-21			Expiry	2014-06-21
	Range CD4	994 (664-1324)			Range CD4	161 (51-271)
	Range CD4%	43,1 (37,1-49,1)			Range CD4%	12,8 (7,8-17,8)
Low
	Pilot 42		Pilot 49		Pilot 53		Pilot 57
Day	CD4	CD4%	CD4	CD4%	CD4	CD4%	CD4	CD4%
2014-04-22	110	11.47			118	12.12	120	12.37
2014-04-23	118	11.82			111	11.17	109	11.09
2014-04-24	127	12.2			124	12.16	122	11.91
2014-04-25					127	12.89
2014-04-29							138	14.08
2014-04-30	134	13.56			133	13.6	132	13.57
2014-05-02					133	13.32	139	14.18
2014-05-05	121	12.26			119	12.27	119	12.13
2014-05-06	134	13.22			133	12.86	132	12.91
2014-05-07	136	13.26			137	13.66	137	13.43
2014-05-08	127	12.68			129	12.61	128	12.75
2014-05-09	128	12.88			133	13.01	129	13.04
2014-05-12					119	12.44	122	13.01
2014-05-13	155	14.34			155	14.48	154	14.34
2014-05-14	110	11.13			111	11.15	108	10.88
2014-05-15	130	12.81					131	12.94
2014-05-16	128	12.3			129	12.58	124	12.27
2014-05-19	124	12.35					121	12.29
2014-05-20	118	12.34			114	11.99	116	12.37
2014-05-21	126	12.89	124	13.09	127	12.6	126	12.7
2014-05-22	114	11.71	115	11.8			114	12.01
2014-05-23	135	13.42	132	13.01			132	13.12
2014-05-26	127	12.24	127	12.19
2014-05-27	148	14.14	143	13.67
2014-05-28	129	12.85	127	12.58	124	12.44	129	12.9
2014-05-30	127	12.59	128	12.8			126	12.61
2014-06-02	129	13.15	127	13.1			128	13.18
2014-06-03	110	11.38	109	11.36			110	11.56
2014-06-04	122	12.22	121	12.06			123	12.25
2014-06-05	141	14.13	140	13.87			139	13.86
2014-06-06	124	12.17	123	12.19			119	11.99
2014-06-10	129	12.92	133	13.23			126	12.61
2014-06-11	120	11.86	117	11.64			124	12.49
2014-06-12	119	12.48	116	12.18			118	12.45
2014-06-16	134	13.32	135	13.29			133	13.14
2014-06-18	117	11.89	119	12			116	11.67
2014-06-19	120	12.2	117	11.95			119	12.05
2014-06-20	116	12.06	114	12.01
Normal	Pilot 42		Pilot 49		Pilot 53		Pilot 57
Day	CD4	CD4%	CD4	CD4%	CD4	CD4%	CD4	CD4%
2014-04-22	731	41.02			734	41.08	743	41.47
2014-04-23	777	42.13			779	43.51	781	43.24
2014-04-24	777	41.81			776	42.55	773	42.9
2014-04-25					754	42.55
2014-04-29							764	42.51
2014-04-30	736	42.86			743	42.97	752	43.62
2014-05-02					741	42.65	754	42.95
2014-05-05	727	41.58			729	41.36	734	41.94
2014-05-06	743	42.89			742	42.77	746	43
2014-05-07	767	42.82			767	43.28	747	42.44
2014-05-08	755	42.87			761	43.19	751	43.19
2014-05-09	764	42.16					754	42.44
2014-05-12					756	43.88	756	43.56
2014-05-13	786	43.82			777	43.58	789	44.08
2014-05-14	757	42.42			753	43.01	748	42.58
2014-05-15	749	42.44			742	42.36	751	42.87
2014-05-16	820	44.44					811	44.77
2014-05-19	781	42.99					772	43.08
2014-05-20	777	43.66					774	43.84
2014-05-21	775	42.95	788	43.51			766	42.56
2014-05-22	738	41.86	728	41.33			741	41.71
2014-05-23	719	42.33	694	41.74			694	41.94
2014-05-26	807	43.24	817	44.06
2014-05-27	750	43.13	750	42.89
2014-05-28	795	43.21	783	42.8	779	43.39	785	43.34
2014-05-30	766	42.82	762	42.68			753	42.15
2014-06-02	779	42.28	779	42.23			776	42.07
2014-06-03	772	43.07	759	42.51			771	42.89
2014-06-04	780	42.85	782	43.24			777	42.93
2014-06-05	761	42.12	766	42.3			766	42.22
2014-06-06	731	40.55	704	39.57			708	39.94
2014-06-10	796	43.8	793	43.85			789	43.98
2014-06-11	729	42.61	729	42.35			723	42.81
2014-06-12	761	43.49	771	43.94			774	44.32
2014-06-16	757	41.97	756	42.11			750	41.7
2014-06-18	770	43.67	757	43.33			765	43.57
2014-06-19	752	42.53	753	42.65			751	42.98
2014-06-20	765	42.25	748	41.96
